# Supplementary material for: Glioblastoma Multiforme Selective Nanomedicines for Improved Anti-Cancer Treatments
Source: MDPI journal article supplement (doi:10.3390/pharmaceutics14071450), 2022-07-12
Supplement: s1 [file s1]

**Table S1.** Physico-chemical characteristics of NMeds formulated with different percentages of PLGA-Cy5.

| PLGA-CY5<br>(% w/w) | Size (nm) | PDI         | Z-potential (mV) | % Weight yield |
|---------------------|-----------|-------------|------------------|----------------|
| 4                   | 142 ± 23  | 0.21 ± 0.01 | -28.8 ± 12       | 28 ± 15        |
| 2                   | 157 ± 15  | 0.07 ± 0.01 | -35.6 ± 10       | 34 ± 11        |
| 1                   | 160 ± 25  | 0.13 ± 0.01 | -28.4 ± 4        | 41 ± 13        |
| 0.4                 | 156 ± 20  | 0.08 ± 0.02 | -30.2 ± 7        | 82 ± 6         |
| 0.2                 | 147 ± 18  | 0.06 ± 0.01 | -31.1 ± 3        | 90 ± 8         |
| 0.1                 | 155 ± 12  | 0.19 ± 0.01 | -31.5 ± 5        | 93 ± 8         |

**Table S2.** The effects of Pluronic® F68 amount on physico-chemical characteristics of NMeds.

| NMed<br>formulation | % w/v surfactant in<br>Aqueous phase<br>(12.5 mL) | Size<br>(nm) | PDI         | Z-potential<br>(mV) | % Residual<br>surfactant | % Weight<br>yield |
|---------------------|---------------------------------------------------|--------------|-------------|---------------------|--------------------------|-------------------|
| 1                   | MilliQ water                                      | 183 ± 12     | 0.14 ± 0.01 | -43.8 ± 5           | n/a                      | 25 ± 8            |
| 2                   | 0.5%                                              | 155 ± 7      | 0.08 ± 0.02 | -39.4 ± 6           | 10 ± 3                   | 42 ± 10           |
| 3                   | 1.5%                                              | 157 ± 8      | 0.07 ± 0.01 | -45.6 ± 4           | 12 ± 5                   | 87 ± 9            |
| 4                   | 3%                                                | 183 ± 10     | 0.20 ± 0.01 | -45.7 ± 7           | 14 ± 7                   | 88 ± 4            |

**Table S3.** Physico-chemical characteristics of NMeds after mock reaction, submitted to several cycles of centrifugation.

| Centrifugation | Size (nm) | PDI         | Z potential (mV) | % Weight yield |
|----------------|-----------|-------------|------------------|----------------|
| 1*             | 147 ± 18  | 0.05 ± 0.01 | -31 ± 3          | 90 ± 8         |
| 2              | 166 ± 27  | 0.12 ± 0.01 | -32 ± 7          | 60 ± 7         |
| 3              | 170 ± 15  | 0.05 ± 0.01 | -31 ± 8          | 43 ± 12        |
| 4              | 160 ± 10  | 0.18 ± 0.03 | -29 ± 9          | 30 ± 15        |
| 5              | 156 ± 11  | 0.08 ± 0.01 | -25 ± 5          | 27 ± 13        |
| 1**            | 166 ± 10  | 0.12 ± 0.01 | -32 ± 5          | 90 ± 13        |

\* Centrifugation step after NMed formulation, followed by mock reaction without any further purification. Sample analysed in reaction buffer.

\*\* Post-modification was run on NMeds directly from the formulation without purification. One centrifugation step was performed on the NMeds after the mock reaction.

**Table S4.** Stability results of non-modified NMeds and targeted NMeds after 3 weeks after storage at 4 - 8°C, freezing at -20°C without trehalose, freezing at -20 °C with trehalose at 3 w/w ratio and after lyophilisation.

| NMed formulation   | Storage conditions               | Size (nm) | PDI         | Z potential (mV) |
|--------------------|----------------------------------|-----------|-------------|------------------|
| non-modified NMeds | Storage 4 - 8°C                  | 289 ± 10  | 0.29 ± 0.01 | -28 ± 11         |
| g7-NMeds           |                                  | 260 ± 14  | 0.33 ± 0.03 | -22.6 ± 8        |
| PAAVF-NMeds        |                                  | 180 ± 9   | 0.25 ± 0.03 | -27.4 ± 6        |
| M08J-NMeds         |                                  | 176 ± 11  | 0.19 ± 0.01 | -27.6 ± 9        |
| M08-NMeds          |                                  | 220 ± 10  | 0.26 ± 0.02 | -18.1 ± 8        |
| Non-modified NMeds | Freezing -20°C without trehalose | 560 ± 60  | 0.66 ± 0.04 | -10.8 ± 8        |
| g7-NMeds           |                                  | 340 ± 54  | 0.33 ± 0.04 | -28.7 ± 9        |
| PAAVF-NMeds        |                                  | 176 ± 9   | 0.13 ± 0.02 | -29.1 ± 6        |
| M08J-NMeds         |                                  | 182 ± 8   | 0.17 ± 0.03 | -27.1 ± 11       |
| M08-NMeds          |                                  | 230 ± 10  | 0.28 ± 0.02 | -28.7 ± 10       |

|                    |                                              |          |             |            |
|--------------------|----------------------------------------------|----------|-------------|------------|
| Non-modified NMeds |                                              | 254 ± 10 | 0.33 ± 0.02 | -25.0 ± 6  |
| g7-NMeds           | Freezing -20°C with trehalose at 3 w/w ratio | 228 ± 8  | 0.21 ± 0.01 | -25.6 ± 8  |
| PAAVF-NMeds        |                                              | 181 ± 9  | 0.12 ± 0.01 | -31.9 ± 5  |
| M08J-NMeds         |                                              | 179 ± 11 | 0.18 ± 0.02 | -30.4 ± 6  |
| M08-NMeds          |                                              | 211 ± 14 | 0.19 ± 0.02 | -30.8 ± 6  |
| Non-modified NMeds |                                              | 350 ± 8  | 0.42 ± 0.03 | -20.4 ± 8  |
| g7-NMeds           | Lyophilisation                               | 288 ± 11 | 0.30 ± 0.02 | -18.8 ± 13 |
| PAAVF-NMeds        |                                              | 189 ± 12 | 0.23 ± 0.01 | -17.2 ± 13 |
| M08J-NMeds         |                                              | 202 ± 9  | 0.24 ± 0.02 | -22.4 ± 12 |
| M08-NMeds          |                                              | 240 ± 14 | 0.25 ± 0.01 | -21.4 ± 12 |

**Table S5.** Full statistical data for the *in vitro* results.

|                                                                                                  |                      |         |  |        |  |
|--------------------------------------------------------------------------------------------------|----------------------|---------|--|--------|--|
|                                                                                                  |                      |         |  |        |  |
| 2-way ANOVA: effect of concentration, effect of treatment, concentration × treatment interaction |                      |         |  |        |  |
|                                                                                                  |                      |         |  |        |  |
| Source of Variation                                                                              | % of total variation | P value |  |        |  |
| Interaction                                                                                      | 14.97                | <0.0001 |  |        |  |
| concentration                                                                                    | 32.58                | <0.0001 |  |        |  |
| treatment                                                                                        | 49.28                | <0.0001 |  |        |  |
| 10 mM                                                                                            |                      |         |  |        |  |
| ANOVA summary                                                                                    |                      |         |  |        |  |
| F                                                                                                |                      |         |  | 5.157  |  |
| P value                                                                                          |                      |         |  | 0.0507 |  |
| P value summary                                                                                  |                      |         |  | ns     |  |
| Significant diff. among means (P < 0.05)?                                                        |                      |         |  | No     |  |

|                                                                        |              |         |                  |
|------------------------------------------------------------------------|--------------|---------|------------------|
| <b>50 mM</b>                                                           |              |         |                  |
| ANOVA summary                                                          |              |         |                  |
| F                                                                      | 26.27        |         |                  |
| P value                                                                | 0.0015       |         |                  |
| P value summary                                                        | **           |         |                  |
| Significant diff. among means ( $P < 0.05$ )?                          | Yes          |         |                  |
| R squared                                                              | 0.9546       |         |                  |
| Tukey's multiple comparisons test                                      | Significant? | Summary | Adjusted P Value |
| PLGA NPS_EMPTY vs. PLGA NPS_PTX-LOADED                                 | Yes          | *       | 0.0248           |
| PLGA NPS_EMPTY vs. PLGA NPS_EMPTY M08 AB-TARGETED                      | No           | ns      | 0.2018           |
| PLGA NPS_EMPTY vs. PLGA NPS_PTX-LOADED M08 AB-TARGETED                 | Yes          | **      | 0.0016           |
| PLGA NPS_EMPTY vs. PTX                                                 | No           | ns      | 0.9819           |
| PLGA NPS_PTX-LOADED vs. PLGA NPS_EMPTY M08 AB-TARGETED                 | No           | ns      | 0.3155           |
| PLGA NPS_PTX-LOADED vs. PLGA NPS_PTX-LOADED M08 AB-TARGETED            | Yes          | *       | 0.0467           |
| PLGA NPS_PTX-LOADED vs. PTX                                            | Yes          | *       | 0.0389           |
| PLGA NPS_EMPTY M08 AB-TARGETED vs. PLGA NPS_PTX-LOADED M08 AB-TARGETED | Yes          | **      | 0.008            |
| PLGA NPS_EMPTY M08 AB-TARGETED vs. PTX                                 | No           | ns      | 0.3437           |
| PLGA NPS_PTX-LOADED M08 AB-TARGETED vs. PTX                            | Yes          | **      | 0.0021           |

|                                                                        |              |         |                  |
|------------------------------------------------------------------------|--------------|---------|------------------|
| <b>100 mM</b>                                                          |              |         |                  |
| ANOVA summary                                                          |              |         |                  |
| F                                                                      | 27.04        |         |                  |
| P value                                                                | 0.0014       |         |                  |
| P value summary                                                        | **           |         |                  |
| Significant diff. among means ( $P < 0.05$ )?                          | Yes          |         |                  |
| R squared                                                              | 0.9558       |         |                  |
| Tukey's multiple comparisons test                                      | Significant? | Summary | Adjusted P Value |
| PLGA NPS_EMPTY vs. PLGA NPS_PTX-LOADED                                 | Yes          | **      | 0.0067           |
| PLGA NPS_EMPTY vs. PLGA NPS_EMPTY M08 AB-TARGETED                      | No           | ns      | 0.9921           |
| PLGA NPS_EMPTY vs. PLGA NPS_PTX-LOADED M08 AB-TARGETED                 | Yes          | **      | 0.0022           |
| PLGA NPS_EMPTY vs. PTX                                                 | No           | ns      | 0.0579           |
| PLGA NPS_PTX-LOADED vs. PLGA NPS_EMPTY M08 AB-TARGETED                 | Yes          | **      | 0.009            |
| PLGA NPS_PTX-LOADED vs. PLGA NPS_PTX-LOADED M08 AB-TARGETED            | No           | ns      | 0.4452           |
| PLGA NPS_PTX-LOADED vs. PTX                                            | No           | ns      | 0.1921           |
| PLGA NPS_EMPTY M08 AB-TARGETED vs. PLGA NPS_PTX-LOADED M08 AB-TARGETED | Yes          | **      | 0.0027           |
| PLGA NPS_EMPTY M08 AB-TARGETED vs. PTX                                 | No           | ns      | 0.0863           |
| PLGA NPS_PTX-LOADED M08 AB-TARGETED vs. PTX                            | Yes          | *       | 0.0321           |

|               |  |  |  |
|---------------|--|--|--|
| <b>500 mM</b> |  |  |  |
| ANOVA summary |  |  |  |

|                                                                        |        |              |         |                  |
|------------------------------------------------------------------------|--------|--------------|---------|------------------|
| F                                                                      | 37.35  |              |         |                  |
| P value                                                                | 0.0006 |              |         |                  |
| P value summary                                                        | ***    |              |         |                  |
| Significant diff. among means (P < 0.05)?                              | Yes    |              |         |                  |
| R squared                                                              | 0.9676 |              |         |                  |
| Tukey's multiple comparisons test                                      |        | Significant? | Summary | Adjusted P Value |
| PLGA NPS_EMPTY vs. PLGA NPS_PTX-LOADED                                 |        | Yes          | **      | 0.0026           |
| PLGA NPS_EMPTY vs. PLGA NPS_EMPTY M08 AB-TARGETED                      |        | No           | ns      | 0.3416           |
| PLGA NPS_EMPTY vs. PLGA NPS_PTX-LOADED M08 AB-TARGETED                 |        | Yes          | ***     | 0.0009           |
| PLGA NPS_EMPTY vs. PTX                                                 |        | No           | ns      | 0.2479           |
| PLGA NPS_PTX-LOADED vs. PLGA NPS_EMPTY M08 AB-TARGETED                 |        | Yes          | *       | 0.0103           |
| PLGA NPS_PTX-LOADED vs. PLGA NPS_PTX-LOADED M08 AB-TARGETED            |        | No           | ns      | 0.3312           |
| PLGA NPS_PTX-LOADED vs. PTX                                            |        | Yes          | *       | 0.013            |
| PLGA NPS_EMPTY M08 AB-TARGETED vs. PLGA NPS_PTX-LOADED M08 AB-TARGETED |        | Yes          | **      | 0.0026           |
| PLGA NPS_EMPTY M08 AB-TARGETED vs. PTX                                 |        | No           | ns      | 0.9972           |
| PLGA NPS_PTX-LOADED M08 AB-TARGETED vs. PTX                            |        | Yes          | **      | 0.0031           |

| Tukey's multiple comparisons test                             | Significant? | Summary | Adjusted P Value |
|---------------------------------------------------------------|--------------|---------|------------------|
| 10:PLGA NPS_EMPTY vs. 10:PLGA NPS_PTX-LOADED                  | No           | ns      | >0.9999          |
| 10:PLGA NPS_EMPTY vs. 10:PLGA NPS_EMPTY M08 AB-TARGETED       | No           | ns      | >0.9999          |
| 10:PLGA NPS_EMPTY vs. 10:PLGA NPS_PTX-LOADED M08 AB-TARGETED  | No           | ns      | 0.6288           |
| 10:PLGA NPS_EMPTY vs. 10:PTX                                  | No           | ns      | >0.9999          |
| 10:PLGA NPS_EMPTY vs. 50:PLGA NPS_EMPTY                       | No           | ns      | >0.9999          |
| 10:PLGA NPS_EMPTY vs. 50:PLGA NPS_PTX-LOADED                  | Yes          | ***     | 0.0006           |
| 10:PLGA NPS_EMPTY vs. 50:PLGA NPS_EMPTY M08 AB-TARGETED       | No           | ns      | 0.1524           |
| 10:PLGA NPS_EMPTY vs. 50:PLGA NPS_PTX-LOADED M08 AB-TARGETED  | Yes          | ****    | <0.0001          |
| 10:PLGA NPS_EMPTY vs. 50:PTX                                  | No           | ns      | >0.9999          |
| 10:PLGA NPS_EMPTY vs. 100:PLGA NPS_EMPTY                      | No           | ns      | >0.9999          |
| 10:PLGA NPS_EMPTY vs. 100:PLGA NPS_PTX-LOADED                 | Yes          | ****    | <0.0001          |
| 10:PLGA NPS_EMPTY vs. 100:PLGA NPS_EMPTY M08 AB-TARGETED      | No           | ns      | >0.9999          |
| 10:PLGA NPS_EMPTY vs. 100:PLGA NPS_PTX-LOADED M08 AB-TARGETED | Yes          | ****    | <0.0001          |
| 10:PLGA NPS_EMPTY vs. 100:PTX                                 | Yes          | *       | 0.0146           |
| 10:PLGA NPS_EMPTY vs. 500:PLGA NPS_EMPTY                      | No           | ns      | 0.1379           |
| 10:PLGA NPS_EMPTY vs. 500:PLGA NPS_PTX-LOADED                 | Yes          | ****    | <0.0001          |
| 10:PLGA NPS_EMPTY vs. 500:PLGA NPS_EMPTY M08 AB-TARGETED      | Yes          | **      | 0.0071           |
| 10:PLGA NPS_EMPTY vs. 500:PLGA NPS_PTX-LOADED M08 AB-TARGETED | Yes          | ****    | <0.0001          |
| 10:PLGA NPS_EMPTY vs. 500:PTX                                 | Yes          | **      | 0.0045           |

|                                                                               |     |      |         |
|-------------------------------------------------------------------------------|-----|------|---------|
| 10:PLGA NPS_PTX-LOADED vs. 10:PLGA NPS_EMPTY M08 AB-TARGETED                  | No  | ns   | >0.9999 |
| 10:PLGA NPS_PTX-LOADED vs. 10:PLGA NPS_PTX-LOADED M08 AB-TARGETED             | No  | ns   | 0.5266  |
| 10:PLGA NPS_PTX-LOADED vs. 10:PTX                                             | No  | ns   | >0.9999 |
| 10:PLGA NPS_PTX-LOADED vs. 50:PLGA NPS_EMPTY                                  | No  | ns   | >0.9999 |
| 10:PLGA NPS_PTX-LOADED vs. 50:PLGA NPS_PTX-LOADED                             | Yes | ***  | 0.0004  |
| 10:PLGA NPS_PTX-LOADED vs. 50:PLGA NPS_EMPTY M08 AB-TARGETED                  | No  | ns   | 0.1127  |
| 10:PLGA NPS_PTX-LOADED vs. 50:PLGA NPS_PTX-LOADED M08 AB-TARGETED             | Yes | **** | <0.0001 |
| 10:PLGA NPS_PTX-LOADED vs. 50:PTX                                             | No  | ns   | 0.9998  |
| 10:PLGA NPS_PTX-LOADED vs. 100:PLGA NPS_EMPTY                                 | No  | ns   | >0.9999 |
| 10:PLGA NPS_PTX-LOADED vs. 100:PLGA NPS_PTX-LOADED                            | Yes | **** | <0.0001 |
| 10:PLGA NPS_PTX-LOADED vs. 100:PLGA NPS_EMPTY M08 AB-TARGETED                 | No  | ns   | >0.9999 |
| 10:PLGA NPS_PTX-LOADED vs. 100:PLGA NPS_PTX-LOADED M08 AB-TARGETED            | Yes | **** | <0.0001 |
| 10:PLGA NPS_PTX-LOADED vs. 100:PTX                                            | Yes | *    | 0.0103  |
| 10:PLGA NPS_PTX-LOADED vs. 500:PLGA NPS_EMPTY                                 | No  | ns   | 0.1016  |
| 10:PLGA NPS_PTX-LOADED vs. 500:PLGA NPS_PTX-LOADED                            | Yes | **** | <0.0001 |
| 10:PLGA NPS_PTX-LOADED vs. 500:PLGA NPS_EMPTY M08 AB-TARGETED                 | Yes | **   | 0.005   |
| 10:PLGA NPS_PTX-LOADED vs. 500:PLGA NPS_PTX-LOADED M08 AB-TARGETED            | Yes | **** | <0.0001 |
| 10:PLGA NPS_PTX-LOADED vs. 500:PTX                                            | Yes | **   | 0.0031  |
| 10:PLGA NPS_EMPTY M08 AB-TARGETED vs. 10:PLGA NPS_PTX-LOADED M08 AB-TARGETED  | No  | ns   | 0.4544  |
| 10:PLGA NPS_EMPTY M08 AB-TARGETED vs. 10:PTX                                  | No  | ns   | >0.9999 |
| 10:PLGA NPS_EMPTY M08 AB-TARGETED vs. 50:PLGA NPS_EMPTY                       | No  | ns   | >0.9999 |
| 10:PLGA NPS_EMPTY M08 AB-TARGETED vs. 50:PLGA NPS_PTX-LOADED                  | Yes | ***  | 0.0003  |
| 10:PLGA NPS_EMPTY M08 AB-TARGETED vs. 50:PLGA NPS_EMPTY M08 AB-TARGETED       | No  | ns   | 0.0897  |
| 10:PLGA NPS_EMPTY M08 AB-TARGETED vs. 50:PLGA NPS_PTX-LOADED M08 AB-TARGETED  | Yes | **** | <0.0001 |
| 10:PLGA NPS_EMPTY M08 AB-TARGETED vs. 50:PTX                                  | No  | ns   | 0.9993  |
| 10:PLGA NPS_EMPTY M08 AB-TARGETED vs. 100:PLGA NPS_EMPTY                      | No  | ns   | >0.9999 |
| 10:PLGA NPS_EMPTY M08 AB-TARGETED vs. 100:PLGA NPS_PTX-LOADED                 | Yes | **** | <0.0001 |
| 10:PLGA NPS_EMPTY M08 AB-TARGETED vs. 100:PLGA NPS_EMPTY M08 AB-TARGETED      | No  | ns   | >0.9999 |
| 10:PLGA NPS_EMPTY M08 AB-TARGETED vs. 100:PLGA NPS_PTX-LOADED M08 AB-TARGETED | Yes | **** | <0.0001 |
| 10:PLGA NPS_EMPTY M08 AB-TARGETED vs. 100:PTX                                 | Yes | **   | 0.0079  |
| 10:PLGA NPS_EMPTY M08 AB-TARGETED vs. 500:PLGA NPS_EMPTY                      | No  | ns   | 0.0806  |
| 10:PLGA NPS_EMPTY M08 AB-TARGETED vs. 500:PLGA NPS_PTX-LOADED                 | Yes | **** | <0.0001 |
| 10:PLGA NPS_EMPTY M08 AB-TARGETED vs. 500:PLGA NPS_EMPTY M08 AB-TARGETED      | Yes | **   | 0.0038  |
| 10:PLGA NPS_EMPTY M08 AB-TARGETED vs. 500:PLGA NPS_PTX-LOADED M08 AB-TARGETED | Yes | **** | <0.0001 |
| 10:PLGA NPS_EMPTY M08 AB-TARGETED vs. 500:PTX                                 | Yes | **   | 0.0024  |
| 10:PLGA NPS_PTX-LOADED M08 AB-TARGETED vs. 10:PTX                             | No  | ns   | 0.7427  |

|                                                                                    |     |      |         |
|------------------------------------------------------------------------------------|-----|------|---------|
| 10:PLGA NPS_PTX-LOADED M08 AB-TARGETED vs. 50:PLGA NPS_EMPTY                       | No  | ns   | 0.7618  |
| 10:PLGA NPS_PTX-LOADED M08 AB-TARGETED vs. 50:PLGA NPS_PTX-LOADED                  | No  | ns   | 0.0977  |
| 10:PLGA NPS_PTX-LOADED M08 AB-TARGETED vs. 50:PLGA NPS_EMPTY M08 AB-TARGETED       | No  | ns   | 0.9999  |
| 10:PLGA NPS_PTX-LOADED M08 AB-TARGETED vs. 50:PLGA NPS_PTX-LOADED M08 AB-TARGETED  | Yes | **** | <0.0001 |
| 10:PLGA NPS_PTX-LOADED M08 AB-TARGETED vs. 50:PTX                                  | No  | ns   | 0.9784  |
| 10:PLGA NPS_PTX-LOADED M08 AB-TARGETED vs. 100:PLGA NPS_EMPTY                      | No  | ns   | 0.5958  |
| 10:PLGA NPS_PTX-LOADED M08 AB-TARGETED vs. 100:PLGA NPS_PTX-LOADED                 | Yes | **   | 0.0027  |
| 10:PLGA NPS_PTX-LOADED M08 AB-TARGETED vs. 100:PLGA NPS_EMPTY M08 AB-TARGETED      | No  | ns   | 0.8691  |
| 10:PLGA NPS_PTX-LOADED M08 AB-TARGETED vs. 100:PLGA NPS_PTX-LOADED M08 AB-TARGETED | Yes | **** | <0.0001 |
| 10:PLGA NPS_PTX-LOADED M08 AB-TARGETED vs. 100:PTX                                 | No  | ns   | 0.7729  |
| 10:PLGA NPS_PTX-LOADED M08 AB-TARGETED vs. 500:PLGA NPS_EMPTY                      | No  | ns   | 0.9998  |
| 10:PLGA NPS_PTX-LOADED M08 AB-TARGETED vs. 500:PLGA NPS_PTX-LOADED                 | Yes | ***  | 0.0002  |
| 10:PLGA NPS_PTX-LOADED M08 AB-TARGETED vs. 500:PLGA NPS_EMPTY M08 AB-TARGETED      | No  | ns   | 0.5701  |
| 10:PLGA NPS_PTX-LOADED M08 AB-TARGETED vs. 500:PLGA NPS_PTX-LOADED M08 AB-TARGETED | Yes | **** | <0.0001 |
| 10:PLGA NPS_PTX-LOADED M08 AB-TARGETED vs. 500:PTX                                 | No  | ns   | 0.4399  |
| 10:PTX vs. 50:PLGA NPS_EMPTY                                                       | No  | ns   | >0.9999 |
| 10:PTX vs. 50:PLGA NPS_PTX-LOADED                                                  | Yes | ***  | 0.0009  |
| 10:PTX vs. 50:PLGA NPS_EMPTY M08 AB-TARGETED                                       | No  | ns   | 0.2116  |
| 10:PTX vs. 50:PLGA NPS_PTX-LOADED M08 AB-TARGETED                                  | Yes | **** | <0.0001 |
| 10:PTX vs. 50:PTX                                                                  | No  | ns   | >0.9999 |
| 10:PTX vs. 100:PLGA NPS_EMPTY                                                      | No  | ns   | >0.9999 |
| 10:PTX vs. 100:PLGA NPS_PTX-LOADED                                                 | Yes | **** | <0.0001 |
| 10:PTX vs. 100:PLGA NPS_EMPTY M08 AB-TARGETED                                      | No  | ns   | >0.9999 |
| 10:PTX vs. 100:PLGA NPS_PTX-LOADED M08 AB-TARGETED                                 | Yes | **** | <0.0001 |
| 10:PTX vs. 100:PTX                                                                 | Yes | *    | 0.0217  |
| 10:PTX vs. 500:PLGA NPS_EMPTY                                                      | No  | ns   | 0.1927  |
| 10:PTX vs. 500:PLGA NPS_PTX-LOADED                                                 | Yes | **** | <0.0001 |
| 10:PTX vs. 500:PLGA NPS_EMPTY M08 AB-TARGETED                                      | Yes | *    | 0.0106  |
| 10:PTX vs. 500:PLGA NPS_PTX-LOADED M08 AB-TARGETED                                 | Yes | **** | <0.0001 |
| 10:PTX vs. 500:PTX                                                                 | Yes | **   | 0.0067  |
| 50:PLGA NPS_EMPTY vs. 50:PLGA NPS_PTX-LOADED                                       | Yes | **   | 0.001   |
| 50:PLGA NPS_EMPTY vs. 50:PLGA NPS_EMPTY M08 AB-TARGETED                            | No  | ns   | 0.2239  |
| 50:PLGA NPS_EMPTY vs. 50:PLGA NPS_PTX-LOADED M08 AB-TARGETED                       | Yes | **** | <0.0001 |
| 50:PLGA NPS_EMPTY vs. 50:PTX                                                       | No  | ns   | >0.9999 |
| 50:PLGA NPS_EMPTY vs. 100:PLGA NPS_EMPTY                                           | No  | ns   | >0.9999 |
| 50:PLGA NPS_EMPTY vs. 100:PLGA NPS_PTX-LOADED                                      | Yes | **** | <0.0001 |
| 50:PLGA NPS_EMPTY vs. 100:PLGA NPS_EMPTY M08 AB-TARGETED                           | No  | ns   | >0.9999 |

|                                                                               |     |      |         |
|-------------------------------------------------------------------------------|-----|------|---------|
| 50:PLGA NPS_EMPTY vs. 100:PLGA NPS_PTX-LOADED M08 AB-TARGETED                 | Yes | **** | <0.0001 |
| 50:PLGA NPS_EMPTY vs. 100:PTX                                                 | Yes | *    | 0.0233  |
| 50:PLGA NPS_EMPTY vs. 500:PLGA NPS_EMPTY                                      | No  | ns   | 0.2041  |
| 50:PLGA NPS_EMPTY vs. 500:PLGA NPS_PTX-LOADED                                 | Yes | **** | <0.0001 |
| 50:PLGA NPS_EMPTY vs. 500:PLGA NPS_EMPTY M08 AB-TARGETED                      | Yes | *    | 0.0114  |
| 50:PLGA NPS_EMPTY vs. 500:PLGA NPS_PTX-LOADED M08 AB-TARGETED                 | Yes | **** | <0.0001 |
| 50:PLGA NPS_EMPTY vs. 500:PTX                                                 | Yes | **   | 0.0072  |
| 50:PLGA NPS_PTX-LOADED vs. 50:PLGA NPS_EMPTY M08 AB-TARGETED                  | No  | ns   | 0.4809  |
| 50:PLGA NPS_PTX-LOADED vs. 50:PLGA NPS_PTX-LOADED M08 AB-TARGETED             | Yes | **   | 0.0065  |
| 50:PLGA NPS_PTX-LOADED vs. 50:PTX                                             | Yes | **   | 0.0039  |
| 50:PLGA NPS_PTX-LOADED vs. 100:PLGA NPS_EMPTY                                 | Yes | ***  | 0.0006  |
| 50:PLGA NPS_PTX-LOADED vs. 100:PLGA NPS_PTX-LOADED                            | No  | ns   | 0.9492  |
| 50:PLGA NPS_PTX-LOADED vs. 100:PLGA NPS_EMPTY M08 AB-TARGETED                 | Yes | **   | 0.0016  |
| 50:PLGA NPS_PTX-LOADED vs. 100:PLGA NPS_PTX-LOADED M08 AB-TARGETED            | No  | ns   | 0.0552  |
| 50:PLGA NPS_PTX-LOADED vs. 100:PTX                                            | No  | ns   | 0.9876  |
| 50:PLGA NPS_PTX-LOADED vs. 500:PLGA NPS_EMPTY                                 | No  | ns   | 0.5141  |
| 50:PLGA NPS_PTX-LOADED vs. 500:PLGA NPS_PTX-LOADED                            | No  | ns   | 0.3092  |
| 50:PLGA NPS_PTX-LOADED vs. 500:PLGA NPS_EMPTY M08 AB-TARGETED                 | No  | ns   | 0.9993  |
| 50:PLGA NPS_PTX-LOADED vs. 500:PLGA NPS_PTX-LOADED M08 AB-TARGETED            | Yes | *    | 0.0189  |
| 50:PLGA NPS_PTX-LOADED vs. 500:PTX                                            | No  | ns   | >0.9999 |
| 50:PLGA NPS_EMPTY M08 AB-TARGETED vs. 50:PLGA NPS_PTX-LOADED M08 AB-TARGETED  | Yes | **** | <0.0001 |
| 50:PLGA NPS_EMPTY M08 AB-TARGETED vs. 50:PTX                                  | No  | ns   | 0.5428  |
| 50:PLGA NPS_EMPTY M08 AB-TARGETED vs. 100:PLGA NPS_EMPTY                      | No  | ns   | 0.1384  |
| 50:PLGA NPS_EMPTY M08 AB-TARGETED vs. 100:PLGA NPS_PTX-LOADED                 | Yes | *    | 0.0222  |
| 50:PLGA NPS_EMPTY M08 AB-TARGETED vs. 100:PLGA NPS_EMPTY M08 AB-TARGETED      | No  | ns   | 0.3156  |
| 50:PLGA NPS_EMPTY M08 AB-TARGETED vs. 100:PLGA NPS_PTX-LOADED M08 AB-TARGETED | Yes | ***  | 0.0002  |
| 50:PLGA NPS_EMPTY M08 AB-TARGETED vs. 100:PTX                                 | No  | ns   | 0.9989  |
| 50:PLGA NPS_EMPTY M08 AB-TARGETED vs. 500:PLGA NPS_EMPTY                      | No  | ns   | >0.9999 |
| 50:PLGA NPS_EMPTY M08 AB-TARGETED vs. 500:PLGA NPS_PTX-LOADED                 | Yes | **   | 0.0016  |
| 50:PLGA NPS_EMPTY M08 AB-TARGETED vs. 500:PLGA NPS_EMPTY M08 AB-TARGETED      | No  | ns   | 0.9834  |
| 50:PLGA NPS_EMPTY M08 AB-TARGETED vs. 500:PLGA NPS_PTX-LOADED M08 AB-TARGETED | Yes | **** | <0.0001 |
| 50:PLGA NPS_EMPTY M08 AB-TARGETED vs. 500:PTX                                 | No  | ns   | 0.9472  |
| 50:PLGA NPS_PTX-LOADED M08 AB-TARGETED vs. 50:PTX                             | Yes | **** | <0.0001 |
| 50:PLGA NPS_PTX-LOADED M08 AB-TARGETED vs. 100:PLGA NPS_EMPTY                 | Yes | **** | <0.0001 |
| 50:PLGA NPS_PTX-LOADED M08 AB-TARGETED vs. 100:PLGA NPS_PTX-LOADED            | No  | ns   | 0.2032  |
| 50:PLGA NPS_PTX-LOADED M08 AB-TARGETED vs. 100:PLGA NPS_EMPTY M08 AB-TARGETED | Yes | **** | <0.0001 |



|                                                                                    |     |      |         |
|------------------------------------------------------------------------------------|-----|------|---------|
| 50:PLGA NPS_PTX-LOADED M08 AB-TARGETED vs. 100:PLGA NPS_PTX-LOADED M08 AB-TARGETED | No  | ns   | 0.9998  |
| 50:PLGA NPS_PTX-LOADED M08 AB-TARGETED vs. 100:PTX                                 | Yes | ***  | 0.0003  |
| 50:PLGA NPS_PTX-LOADED M08 AB-TARGETED vs. 500:PLGA NPS_EMPTY                      | Yes | **** | <0.0001 |
| 50:PLGA NPS_PTX-LOADED M08 AB-TARGETED vs. 500:PLGA NPS_PTX-LOADED                 | No  | ns   | 0.8618  |
| 50:PLGA NPS_PTX-LOADED M08 AB-TARGETED vs. 500:PLGA NPS_EMPTY M08 AB-TARGETED      | Yes | ***  | 0.0006  |
| 50:PLGA NPS_PTX-LOADED M08 AB-TARGETED vs. 500:PLGA NPS_PTX-LOADED M08 AB-TARGETED | No  | ns   | >0.9999 |
| 50:PLGA NPS_PTX-LOADED M08 AB-TARGETED vs. 500:PTX                                 | Yes | ***  | 0.0009  |
| 50:PTX vs. 100:PLGA NPS_EMPTY                                                      | No  | ns   | >0.9999 |
| 50:PTX vs. 100:PLGA NPS_PTX-LOADED                                                 | Yes | ***  | 0.0001  |
| 50:PTX vs. 100:PLGA NPS_EMPTY M08 AB-TARGETED                                      | No  | ns   | >0.9999 |
| 50:PTX vs. 100:PLGA NPS_PTX-LOADED M08 AB-TARGETED                                 | Yes | **** | <0.0001 |
| 50:PTX vs. 100:PTX                                                                 | No  | ns   | 0.0823  |
| 50:PTX vs. 500:PLGA NPS_EMPTY                                                      | No  | ns   | 0.509   |
| 50:PTX vs. 500:PLGA NPS_PTX-LOADED                                                 | Yes | **** | <0.0001 |
| 50:PTX vs. 500:PLGA NPS_EMPTY M08 AB-TARGETED                                      | Yes | *    | 0.0421  |
| 50:PTX vs. 500:PLGA NPS_PTX-LOADED M08 AB-TARGETED                                 | Yes | **** | <0.0001 |
| 50:PTX vs. 500:PTX                                                                 | Yes | *    | 0.027   |
| 100:PLGA NPS_EMPTY vs. 100:PLGA NPS_PTX-LOADED                                     | Yes | **** | <0.0001 |
| 100:PLGA NPS_EMPTY vs. 100:PLGA NPS_EMPTY M08 AB-TARGETED                          | No  | ns   | >0.9999 |
| 100:PLGA NPS_EMPTY vs. 100:PLGA NPS_PTX-LOADED M08 AB-TARGETED                     | Yes | **** | <0.0001 |
| 100:PLGA NPS_EMPTY vs. 100:PTX                                                     | Yes | *    | 0.013   |
| 100:PLGA NPS_EMPTY vs. 500:PLGA NPS_EMPTY                                          | No  | ns   | 0.1251  |
| 100:PLGA NPS_EMPTY vs. 500:PLGA NPS_PTX-LOADED                                     | Yes | **** | <0.0001 |
| 100:PLGA NPS_EMPTY vs. 500:PLGA NPS_EMPTY M08 AB-TARGETED                          | Yes | **   | 0.0063  |
| 100:PLGA NPS_EMPTY vs. 500:PLGA NPS_PTX-LOADED M08 AB-TARGETED                     | Yes | **** | <0.0001 |
| 100:PLGA NPS_EMPTY vs. 500:PTX                                                     | Yes | **   | 0.004   |
| 100:PLGA NPS_PTX-LOADED vs. 100:PLGA NPS_EMPTY M08 AB-TARGETED                     | Yes | **** | <0.0001 |
| 100:PLGA NPS_PTX-LOADED vs. 100:PLGA NPS_PTX-LOADED M08 AB-TARGETED                | No  | ns   | 0.7509  |
| 100:PLGA NPS_PTX-LOADED vs. 100:PTX                                                | No  | ns   | 0.2154  |
| 100:PLGA NPS_PTX-LOADED vs. 500:PLGA NPS_EMPTY                                     | Yes | *    | 0.0249  |
| 100:PLGA NPS_PTX-LOADED vs. 500:PLGA NPS_PTX-LOADED                                | No  | ns   | 0.9979  |
| 100:PLGA NPS_PTX-LOADED vs. 500:PLGA NPS_EMPTY M08 AB-TARGETED                     | No  | ns   | 0.3642  |
| 100:PLGA NPS_PTX-LOADED vs. 500:PLGA NPS_PTX-LOADED M08 AB-TARGETED                | No  | ns   | 0.4359  |
| 100:PLGA NPS_PTX-LOADED vs. 500:PTX                                                | No  | ns   | 0.4857  |
| 100:PLGA NPS_EMPTY M08 AB-TARGETED vs. 100:PLGA NPS_PTX-LOADED M08 AB-TARGETED     | Yes | **** | <0.0001 |
| 100:PLGA NPS_EMPTY M08 AB-TARGETED vs. 100:PTX                                     | Yes | *    | 0.0365  |
| 100:PLGA NPS_EMPTY M08 AB-TARGETED vs. 500:PLGA NPS_EMPTY                          | No  | ns   | 0.2901  |

|                                                                                     |     |      |         |
|-------------------------------------------------------------------------------------|-----|------|---------|
| 100:PLGA NPS_EMPTY M08 AB-TARGETED vs. 500:PLGA NPS_PTX-LOADED                      | Yes | **** | <0.0001 |
| 100:PLGA NPS_EMPTY M08 AB-TARGETED vs. 500:PLGA NPS_EMPTY M08 AB-TARGETED           | Yes | *    | 0.0181  |
| 100:PLGA NPS_EMPTY M08 AB-TARGETED vs. 500:PLGA NPS_PTX-LOADED M08 AB-TARGETED      | Yes | **** | <0.0001 |
| 100:PLGA NPS_EMPTY M08 AB-TARGETED vs. 500:PTX                                      | Yes | *    | 0.0114  |
| 100:PLGA NPS_PTX-LOADED M08 AB-TARGETED vs. 100:PTX                                 | Yes | **   | 0.0025  |
| 100:PLGA NPS_PTX-LOADED M08 AB-TARGETED vs. 500:PLGA NPS_EMPTY                      | Yes | ***  | 0.0002  |
| 100:PLGA NPS_PTX-LOADED M08 AB-TARGETED vs. 500:PLGA NPS_PTX-LOADED                 | No  | ns   | >0.9999 |
| 100:PLGA NPS_PTX-LOADED M08 AB-TARGETED vs. 500:PLGA NPS_EMPTY M08 AB-TARGETED      | Yes | **   | 0.0051  |
| 100:PLGA NPS_PTX-LOADED M08 AB-TARGETED vs. 500:PLGA NPS_PTX-LOADED M08 AB-TARGETED | No  | ns   | >0.9999 |
| 100:PLGA NPS_PTX-LOADED M08 AB-TARGETED vs. 500:PTX                                 | Yes | **   | 0.0082  |
| 100:PTX vs. 500:PLGA NPS_EMPTY                                                      | No  | ns   | 0.9994  |
| 100:PTX vs. 500:PLGA NPS_PTX-LOADED                                                 | Yes | *    | 0.0193  |
| 100:PTX vs. 500:PLGA NPS_EMPTY M08 AB-TARGETED                                      | No  | ns   | >0.9999 |
| 100:PTX vs. 500:PLGA NPS_PTX-LOADED M08 AB-TARGETED                                 | Yes | ***  | 0.0008  |
| 100:PTX vs. 500:PTX                                                                 | No  | ns   | >0.9999 |
| 500:PLGA NPS_EMPTY vs. 500:PLGA NPS_PTX-LOADED                                      | Yes | **   | 0.0018  |
| 500:PLGA NPS_EMPTY vs. 500:PLGA NPS_EMPTY M08 AB-TARGETED                           | No  | ns   | 0.9884  |
| 500:PLGA NPS_EMPTY vs. 500:PLGA NPS_PTX-LOADED M08 AB-TARGETED                      | Yes | **** | <0.0001 |
| 500:PLGA NPS_EMPTY vs. 500:PTX                                                      | No  | ns   | 0.9594  |
| 500:PLGA NPS_PTX-LOADED vs. 500:PLGA NPS_EMPTY M08 AB-TARGETED                      | Yes | *    | 0.0389  |
| 500:PLGA NPS_PTX-LOADED vs. 500:PLGA NPS_PTX-LOADED M08 AB-TARGETED                 | No  | ns   | 0.9867  |
| 500:PLGA NPS_PTX-LOADED vs. 500:PTX                                                 | No  | ns   | 0.0602  |
| 500:PLGA NPS_EMPTY M08 AB-TARGETED vs. 500:PLGA NPS_PTX-LOADED M08 AB-TARGETED      | Yes | **   | 0.0017  |
| 500:PLGA NPS_EMPTY M08 AB-TARGETED vs. 500:PTX                                      | No  | ns   | >0.9999 |
| 500:PLGA NPS_PTX-LOADED M08 AB-TARGETED vs. 500:PTX                                 | Yes | **   | 0.0027  |

| After treatment    | Two-way ANOVA        | repeated | measures | with Tukey's post hoc test |  |
|--------------------|----------------------|----------|----------|----------------------------|--|
|                    |                      |          |          |                            |  |
| Two-way RM ANOVA   | Matching:<br>Stacked |          |          |                            |  |
| Assume sphericity? | No                   |          |          |                            |  |
| Alpha              | 0.05                 |          |          |                            |  |
|                    |                      |          |          |                            |  |

| Source of Variation           | % of total variation | P value | P value summary | Significant?             | Geisser-Greenhouse's epsilon |
|-------------------------------|----------------------|---------|-----------------|--------------------------|------------------------------|
| Time x treatment              | 8.904                | <0.0001 | ****            | Yes                      |                              |
| Time                          | 55.76                | <0.0001 | ****            | Yes                      | 1                            |
| treatment                     | 22.79                | 0.0107  | *               | Yes                      |                              |
| Subject                       | 9.697                | <0.0001 | ****            | Yes                      |                              |
|                               |                      |         |                 |                          |                              |
| ANOVA table                   | SS                   | DF      | MS              | F (DFn, DFd)             | P value                      |
| Time x treatment              | 222709               | 272     | 818.8           | F (272, 680) = 7.824     | P<0.0001                     |
| Time                          | 1394625              | 68      | 20509           | F (68.00, 680.0) = 196.0 | P<0.0001                     |
| treatment                     | 570109               | 4       | 142527          | F (4, 10) = 5.877        | P=0.0107                     |
| Subject                       | 242522               | 10      | 24252           | F (10, 680) = 231.7      | P<0.0001                     |
| Residual                      | 71162                | 680     | 104.7           |                          |                              |
|                               |                      |         |                 |                          |                              |
| Data summary                  |                      |         |                 |                          |                              |
| Number of columns (treatment) | 5                    |         |                 |                          |                              |
| Number of rows (Time)         | 69                   |         |                 |                          |                              |
| Number of subjects (Subject)  | 15                   |         |                 |                          |                              |
| Number of missing values      | 0                    |         |                 |                          |                              |

**Repeated measures ANOVA, effect of treatment: (F4,10)=5.877; \* P=0.0107, effect of time: (F68, 680)=196.0; \*\*\*\* P<0.0001, treatment x time interaction: (F272,680)= 7,824; \*\*\*\* P<0.0001**

|                                                                        |            |                    |              |         |                  |
|------------------------------------------------------------------------|------------|--------------------|--------------|---------|------------------|
| Post hoc analysis                                                      |            |                    |              |         |                  |
| Compare column means (main column effect)                              |            |                    |              |         |                  |
|                                                                        |            |                    |              |         |                  |
| Number of families                                                     | 1          |                    |              |         |                  |
| Number of comparisons per family                                       | 10         |                    |              |         |                  |
| Alpha                                                                  | 0.05       |                    |              |         |                  |
|                                                                        |            |                    |              |         |                  |
| Tukey's multiple comparisons test                                      | Mean Diff. | 95.00% CI of diff. | Significant? | Summary | Adjusted P Value |
|                                                                        |            |                    |              |         |                  |
| PLGA NPS_EMPTY vs. PLGA NPS_PTX-LOADED M08 AB-TARGETED                 | -51.66     | -65.05 to -38.27   | Yes          | ****    | <0.0001          |
| PLGA NPS_EMPTY vs. PLGA NPS_EMPTY M08 AB-TARGETED                      | 13.59      | 6.543 to 20.64     | Yes          | ****    | <0.0001          |
| PLGA NPS_EMPTY vs. PLGA NPS_PTX-LOADED                                 | -23.7      | -34.36 to -13.04   | Yes          | ****    | <0.0001          |
| PLGA NPS_EMPTY vs. FREE PTX                                            | 3.685      | -5.961 to 13.33    | No           | ns      | 0.8331           |
| PLGA NPS_PTX-LOADED M08 AB-TARGETED vs. PLGA NPS_EMPTY M08 AB-TARGETED | 65.25      | 52.37 to 78.14     | Yes          | ****    | <0.0001          |

|                                                             |        |                   |     |      |         |
|-------------------------------------------------------------|--------|-------------------|-----|------|---------|
| PLGA NPS_PTX-LOADED M08 AB-TARGETED vs. PLGA NPS_PTX-LOADED | 27.96  | 12.83 to 43.10    | Yes | **** | <0.0001 |
| PLGA NPS_PTX-LOADED M08 AB-TARGETED vs. FREE PTX            | 55.35  | 40.90 to 69.79    | Yes | **** | <0.0001 |
| PLGA NPS_EMPTY M08 AB-TARGETED vs. PLGA NPS_PTX-LOADED      | -37.29 | -47.31 to -27.27  | Yes | **** | <0.0001 |
| PLGA NPS_EMPTY M08 AB-TARGETED vs. FREE PTX                 | -9.908 | -18.84 to -0.9801 | Yes | *    | 0.0211  |
| PLGA NPS_PTX-LOADED vs. FREE PTX                            | 27.38  | 15.41 to 39.35    | Yes | **** | <0.0001 |
